# Supplementary material
Source: PubMed Central journal article supplement (PMC8629026)
Supplement: NIHMS1754035-supplement-1.pdf [file NIHMS1754035-supplement-1.pdf]

# Supplementary Figure 1 (related to Figure 6)

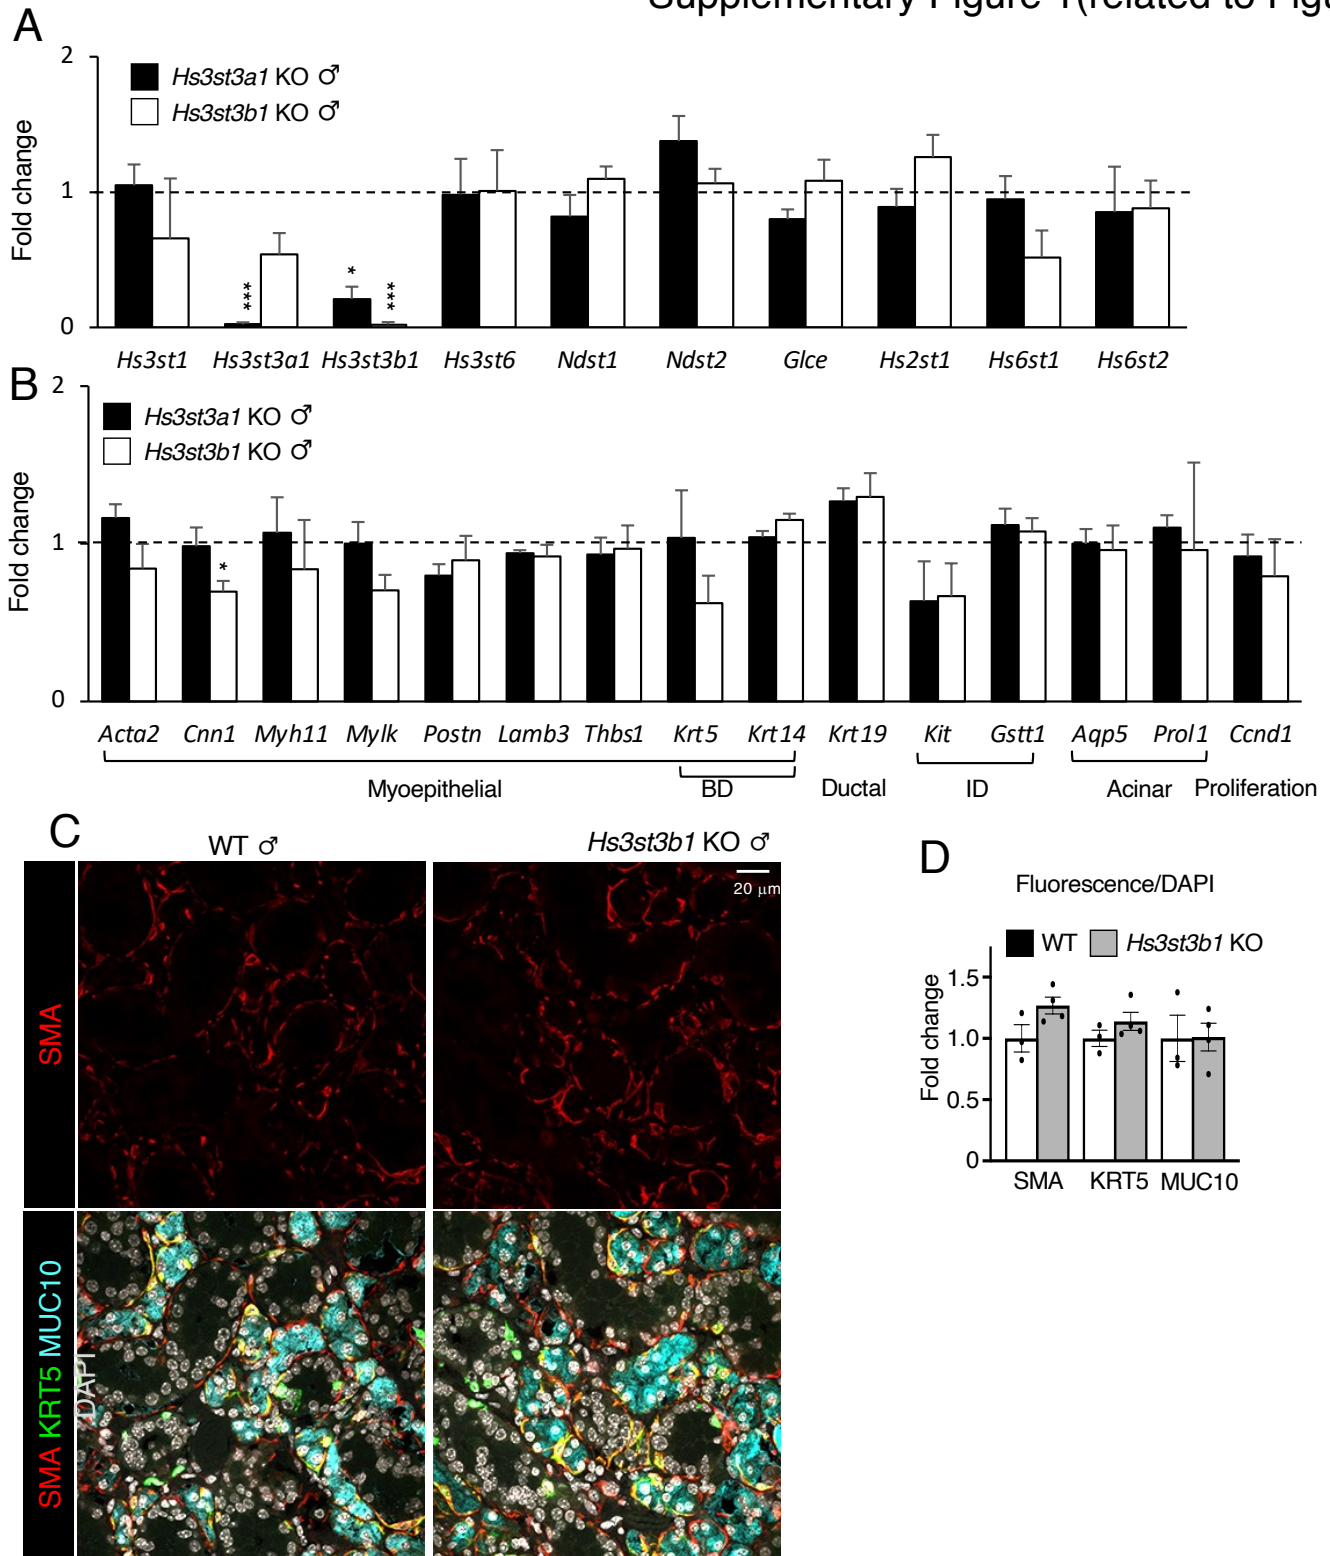

**Supplementary Figure 1. Gene expression changes in HS biosynthetic enzymes and different cell type markers in adult *Hs3st3a1* and *Hs3st3b1* KO SMGs compared to WT.**

(A-B) Gene expression in adult male SMGs. Gene expression was normalized to wildtype control (dotted line) and *Rps29*. Error bars: SEM. One-way ANOVA compared to WT, \*  $p < 0.05$ , \*\*  $p < 0.01$  and \*\*\*  $p < 0.001$ . (C) Representative images of single confocal sections from WT and *Hs3st3b1* KO SMGs showing KRT5 (green), SMA (red), MUC10 (cyan) and nuclei (gray). Scale bar: 20  $\mu$ m. (D) Quantification of fluorescence intensity normalized to total nuclei staining and expressed as a fold change compared to WT. Three SMGs with at least 5 different positions were imaged and used for quantification. Error bars: SEM. One-way ANOVA compared to WT, not significant.

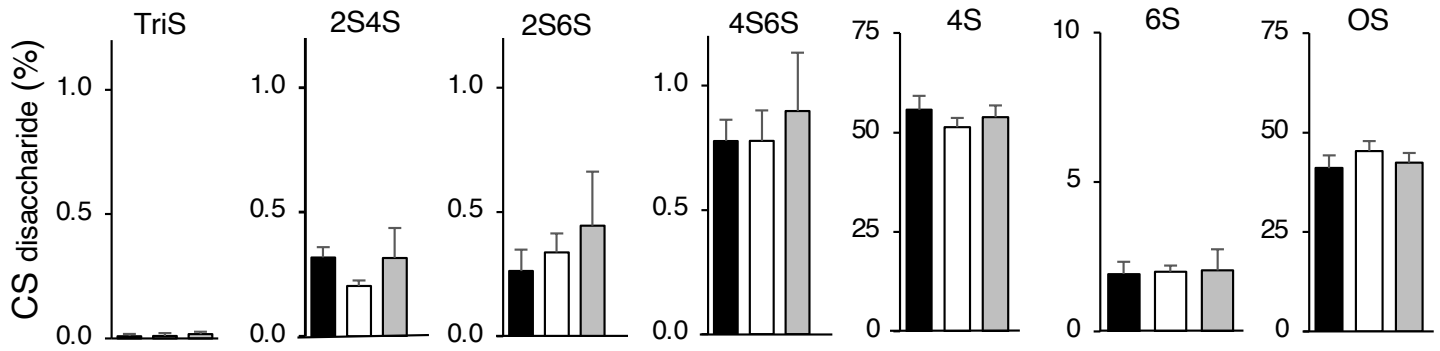

**Supplementary Figure 2. Composition of CS disaccharides in adult SMGs.** Analysis of CS disaccharide composition between WT, *Hs3st3a1* KO and *Hs3st3b1* KO SMGs. All data were averaged. Error bars: SD. One-way ANOVA compared to WT, \* p < 0.05. N = 4 for each group.

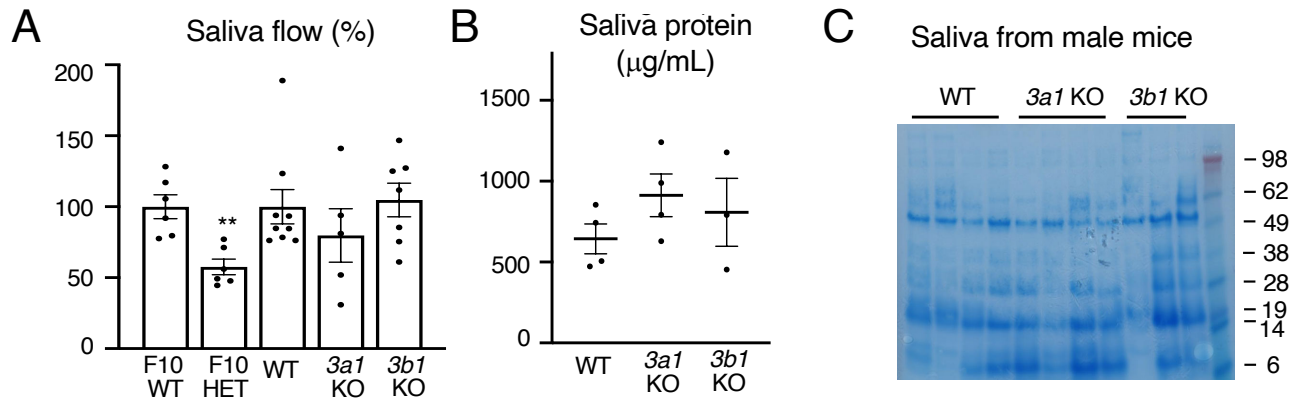

**Supplementary Figure 3. *Hs3st3a1* and *Hs3st3b1* KO male mice do not show any differences in saliva flow and saliva protein compared to WT.**

(A) Salivary flow rates in adult male mice were determined following collection of whole saliva after pilocarpine stimulation. Saliva flow normalized to the WT and shown as %. Mean  $\pm$  SEM. Dots represent saliva measurements of individual mice. Unpaired t-test for FGF10 HET, \*\*  $P < 0.01$ , as compared to FGF10 WT. One-way ANOVA for *Hs3st3a1* KO and *Hs3st3b1* KO compared to WT, not significant (C) Quantification of protein concentration in saliva from male mice assessed using BCA assay. Graph shows Mean  $\pm$  SEM. Dots represent measurements of individual mice. No significant differences detected compared to WT littermates. (C) Saliva (15  $\mu$ l) from male (C) mice displayed no obvious differences in protein expression profiles of saliva in 4-12% gradient SDS-polyacrylamide gels stained with Coomassie Blue.
